# Supplementary material for: Field surveys along habitat gradients revealed differences in herpetofauna assemblage in Margalla Hills National Park, Islamabad, Pakistan
Source: Biodivers Data J. 2021 Mar 31;9:e61541. doi: 10.3897/BDJ.9.e61541 (PMC8026535; doi:10.3897/BDJ.9.e61541)
Supplement: Supplementary material 3 — Species list [file bdj-09-e61541-s003.xlsx]

## Sheet: Worksheet
Species				HT			UF			UA			MHNP			IBI
	H	CS	I	N	PD	ER	N	PD	ER	N	PD	ER	N	PD	ER	HT	UF	UA
Duttaphrynus stomaticus	HG	LC	Yes	13	115.56	0.36	18	160	0.5	11	97.78	0.31	42	124.44	0.59	30	30	30
Duttaphyrnus melanostictus	HG	LC	Yes	15	133.33	0.42	8	71.11	0.22	41	364.44	1.14	64	189.63	0.31	30	35	20
Microhyla nilphameriensis	HG	LC	No	11	97.78	0.31	19	168.89	0.53	3	26.67	0.08	33	97.78	0.32	35	30	40
Euphylctis cyanophlyctis	HS	LC	No	9	80	0.25	21	186.67	0.58	5	44.44	0.14	35	103.7	0	45	35	45
Fejervarya spp.	HS	LC	No	6	53.33	0.17	28	248.89	0.78	8	71.11	0.22	42	124.44	0.39	45	35	45
Hoplobatrachus tigerinus	HG	LC	No	14	124.44	0.39	31	275.56	0.86	19	168.89	0.53	64	189.63	0	35	25	30
Sphaerotheca spp.	HS	LC	No	3	26.67	0.08	17	151.11	0.47	2	17.78	0.06	22	65.19	0.59	45	40	45
Calotes versicolor	HS	NE	No	14	124.44	0.39	6	53.33	0.17	1	8.89	0.03	21	62.22	0	45	50	50
Laudakia agrorensis	HS	NE	No	7	62.22	0.19	11	97.78	0.31	2	17.78	0.06	20	59.26	0.2	50	45	45
Hemidactylus brookii	HG	LC	No	17	151.11	0.47	21	186.67	0.58	15	133.33	0.42	53	157.04	0.2	35	30	35
Hemidactylus flaviviridis	HS	NE	Yes	12	106.67	0.33	17	151.11	0.47	3	26.67	0.08	32	94.81	0	40	40	45
Ophisops jerdonii	HS	LC	No	17	151.11	0.47	24	213.33	0.67	8	71.11	0.22	49	145.19	0.19	40	35	45
Eutrophis dissimilis	HS	NE	No	8	71.11	0.22	14	124.44	0.39	6	53.33	0.17	28	82.96	0.49	50	45	50
Eurylepis taeniolatus	HS	NE	No	4	35.56	0.11	11	97.78	0.31	6	53.33	0.17	21	62.22	0.29	50	45	50
Scincella himalayanus	HS	NE	No	10	88.89	0.28	18	160	0.5	3	26.67	0.08	31	91.85	0.45	45	45	50
Varanus bengalensis	HG	LC	Yes	14	124.44	0.39	23	204.44	0.64	11	97.78	0.31	48	142.22	0.26	30	25	30
Myriopholis macrorhyncha	HS	NE	No	2	17.78	0.06	6	53.33	0.17	0	0	0	8	23.7	0.2	50	50	0
Indotyphlops braminus	HS	NE	No	4	14.81	0.11	8	71.11	0.22	1	8.89	0.03	13	38.52	0.29	50	50	50
Platyceps rhodorachis	HS	NE	No	3	11.11	0.08	0	0	0	0	0	0	3	8.89	0	50	0	0
Ptyas mucosus mucosus	HG	NE	No	4	14.81	0.11	8	71.11	0.22	2	17.78	0.06	14	41.48	0.45	45	45	45
Dendrelaphis tristis	HS	NE	No	1	3.7	0.03	0	0	0	0	0	0	1	2.96	0	50	0	0
Fowlea piscator	HS	NE	No	1	3.7	0.03	0	0	0	0	0	0	1	2.96	0.08	50	0	0
																945 (E)	735 (G)	750 (G)
